# Supplementary material
Source: Springer Nature journal article supplement (https://www.springermedizin.de/resource/supplementary/12874_2008_295_MOESM1_ESM.pdf/9434176)

sex

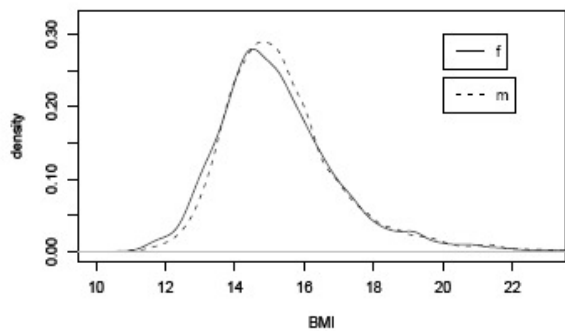

smoking in pregnancy

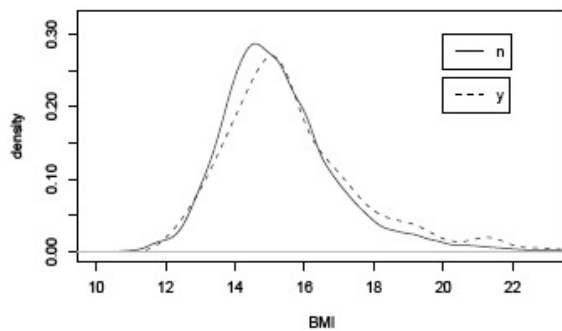

TV watching (h/day)

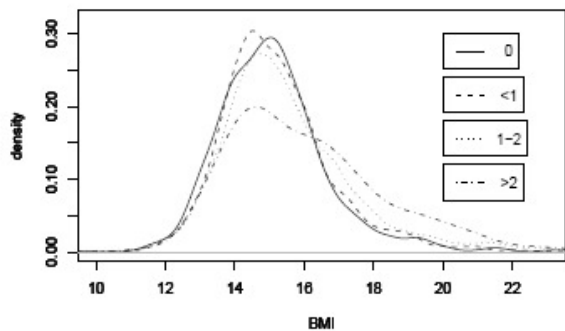

breastfeeding

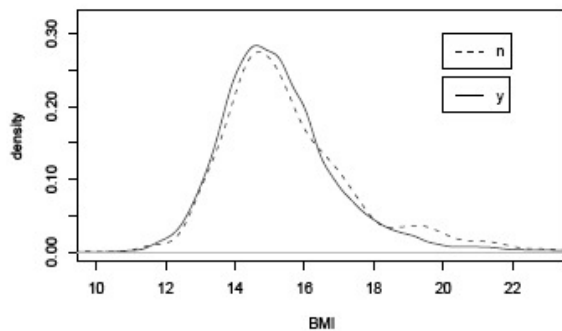

meals per day

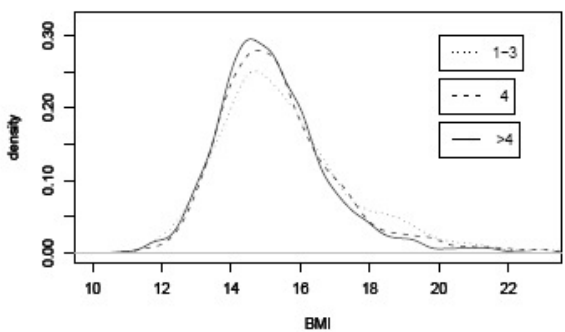

parents' graduate

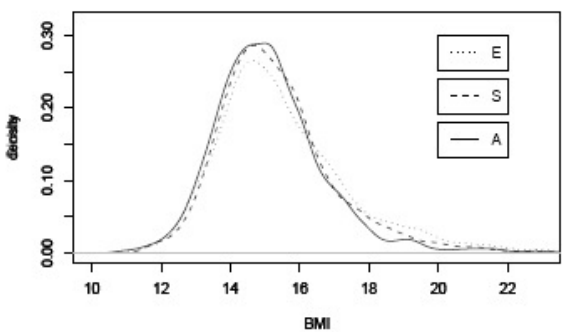

mother's BMI

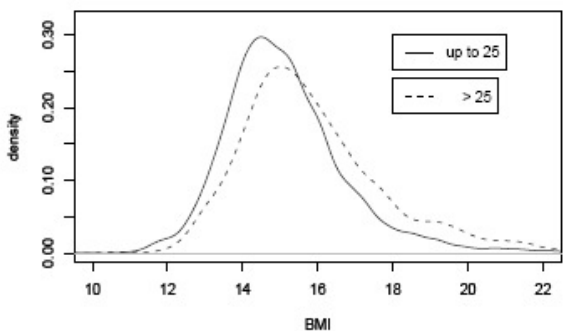

weight gain in first 2y

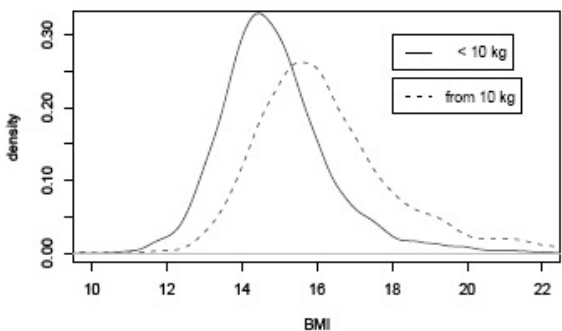

Supplement: MOESM1 [file 9434176]
